# Supplementary material
Source: Springer Nature journal article supplement (https://www.springermedizin.de/resource/supplementary/12880_2008_74_MOESM2_ESM.pdf/9450484)

**Supine****Prone****Supine****Prone****CMR****A**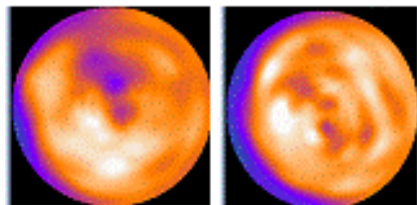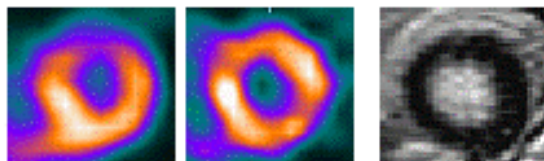**B**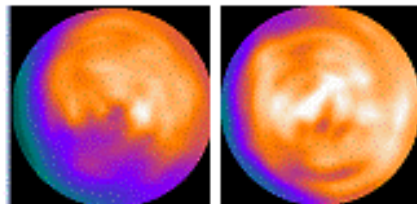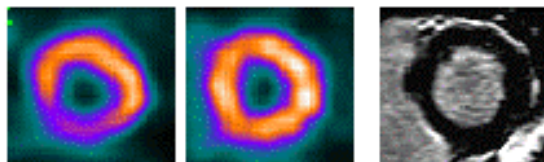**C**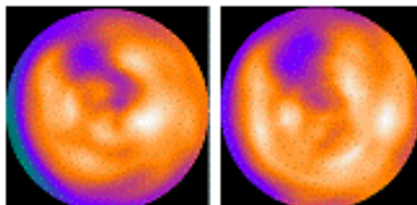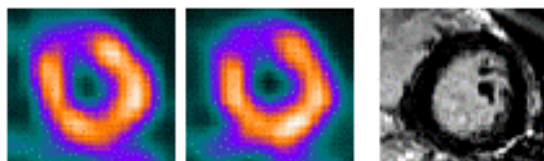

Supplement: MOESM2 [file 9450484]
